# Supplementary material
Source: publisher figshare collection journal article supplement (https://scielo.figshare.com/ndownloader/files/34723717)
Supplement: Supplementary file 1 [file 34723717]

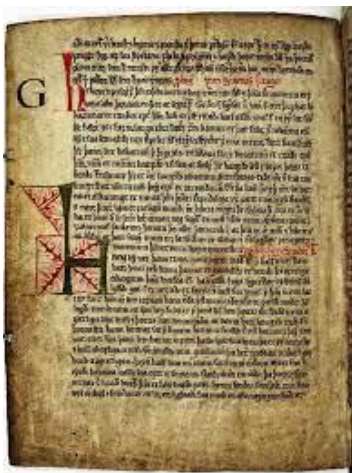

# A brief saga about OA books\*

Niels Stern

Director, OAPEN Foundation

Co-director DOAB Foundation

@nielsstern | @OAPENbooks | @DOABooks

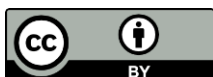

# The beginning

2003

# Scholarly book publishing

Museum Tusculanum Press (anno 1974)

Scholarly publisher at University of Copenhagen,  
Denmark

Humanities and Social Sciences

60 books annually, 10 journals

Published books in 23 languages

International distribution

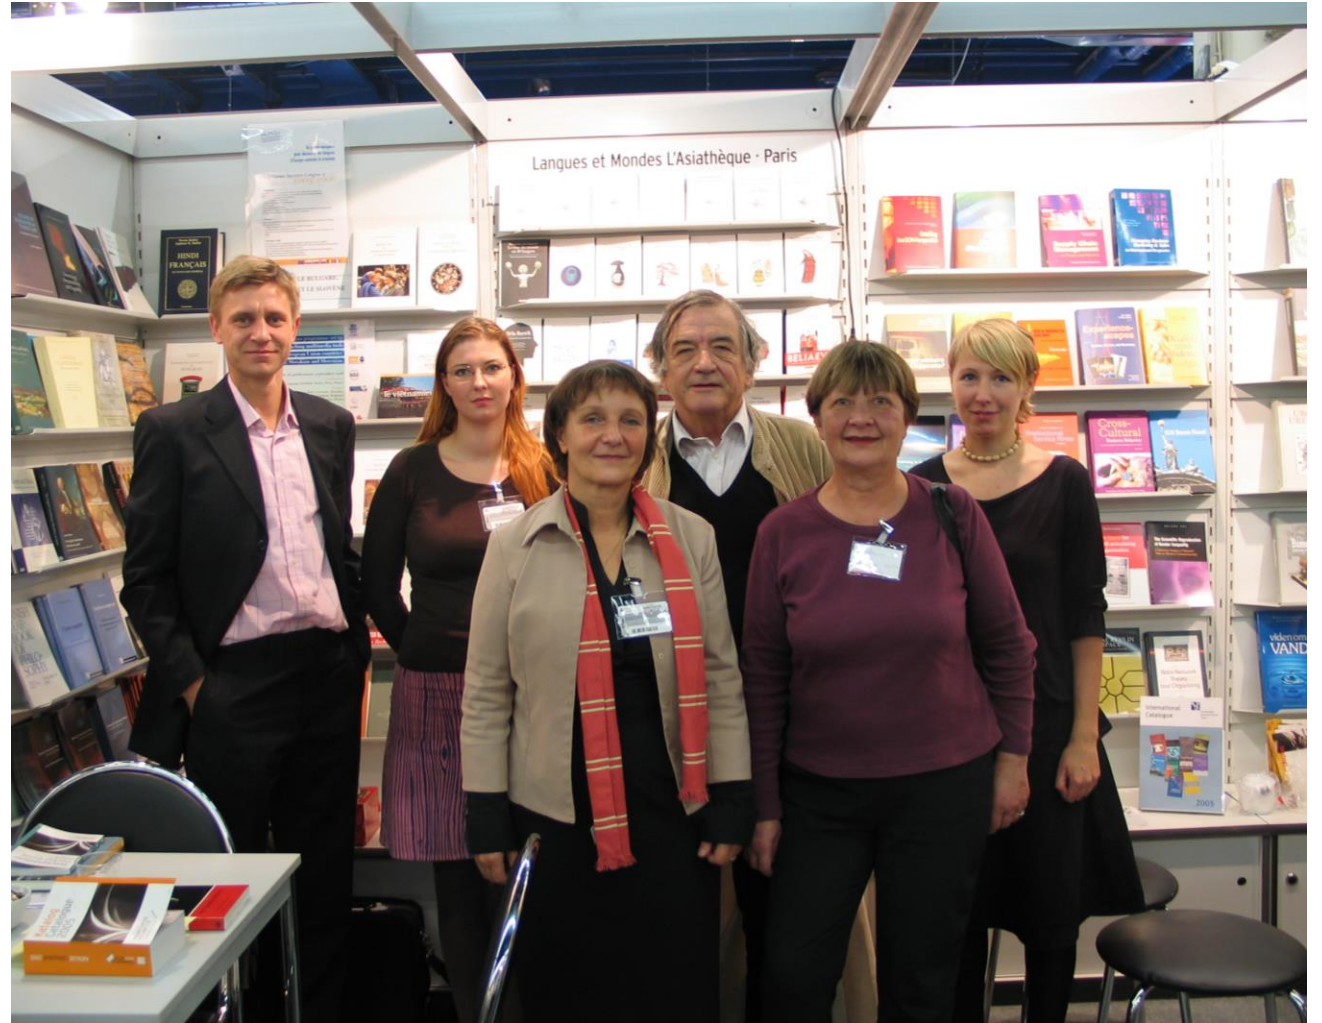

Frankfurt Book Fair, 2005  
Private photo

# Printed books

Love/hate relationship

Lovely books, important for the author

Declining sales

Storage challenges

Much research goes into the monograph –  
needs to be disseminated wide and far

# E-books

Pioneering academic e-books for sale did not  
solve our challenges

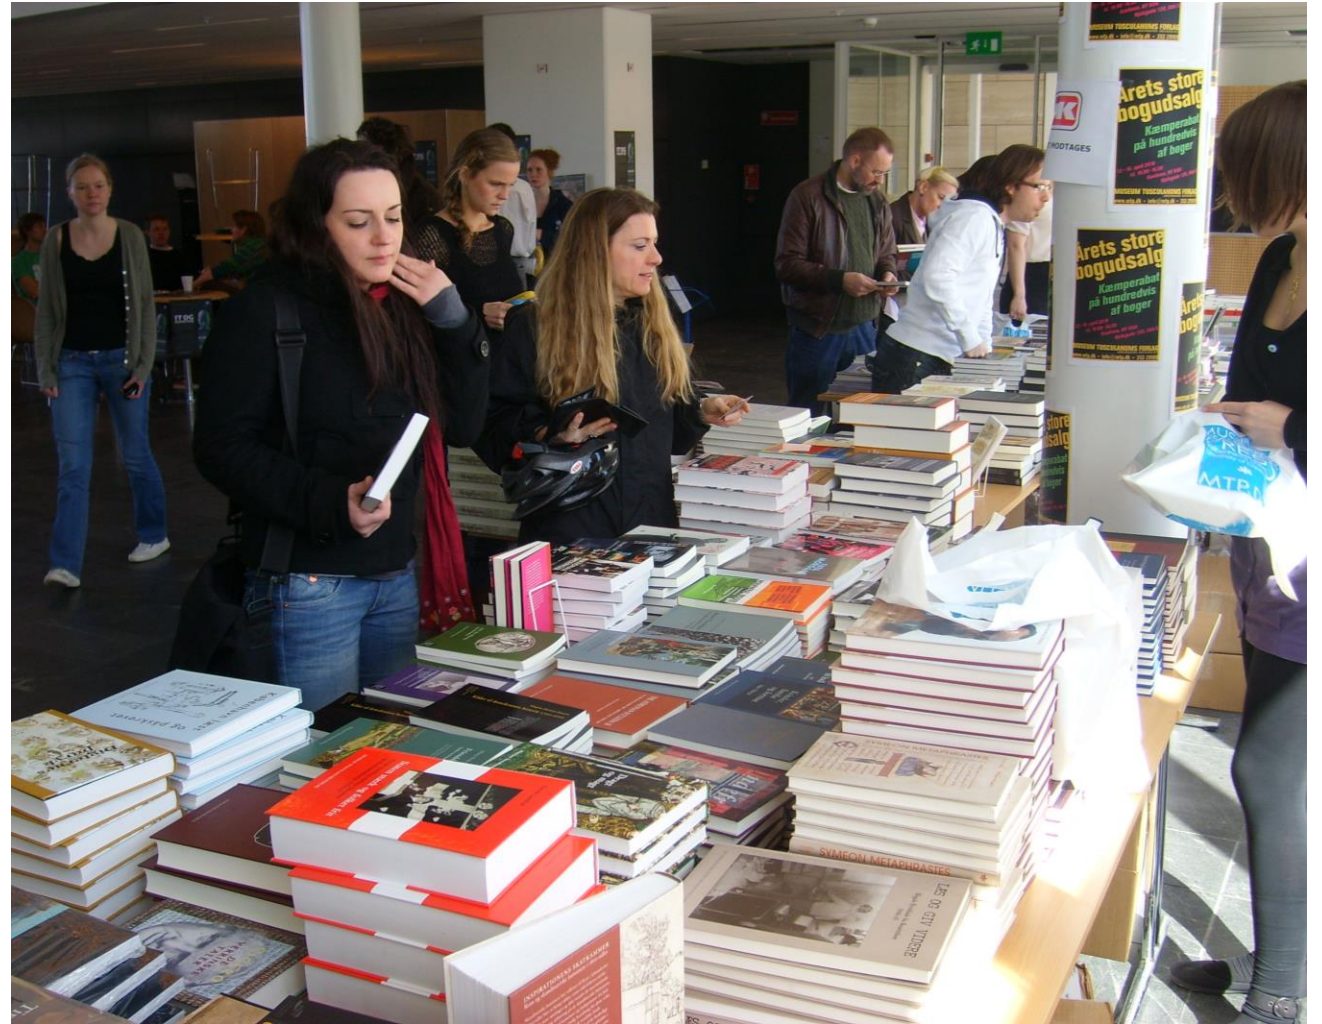

Selling books on campus, 2007  
Private photo



# Google Books

Opening up 20% of our 1,000+ books

Increasing visibility and discoverability

Significant usage increase

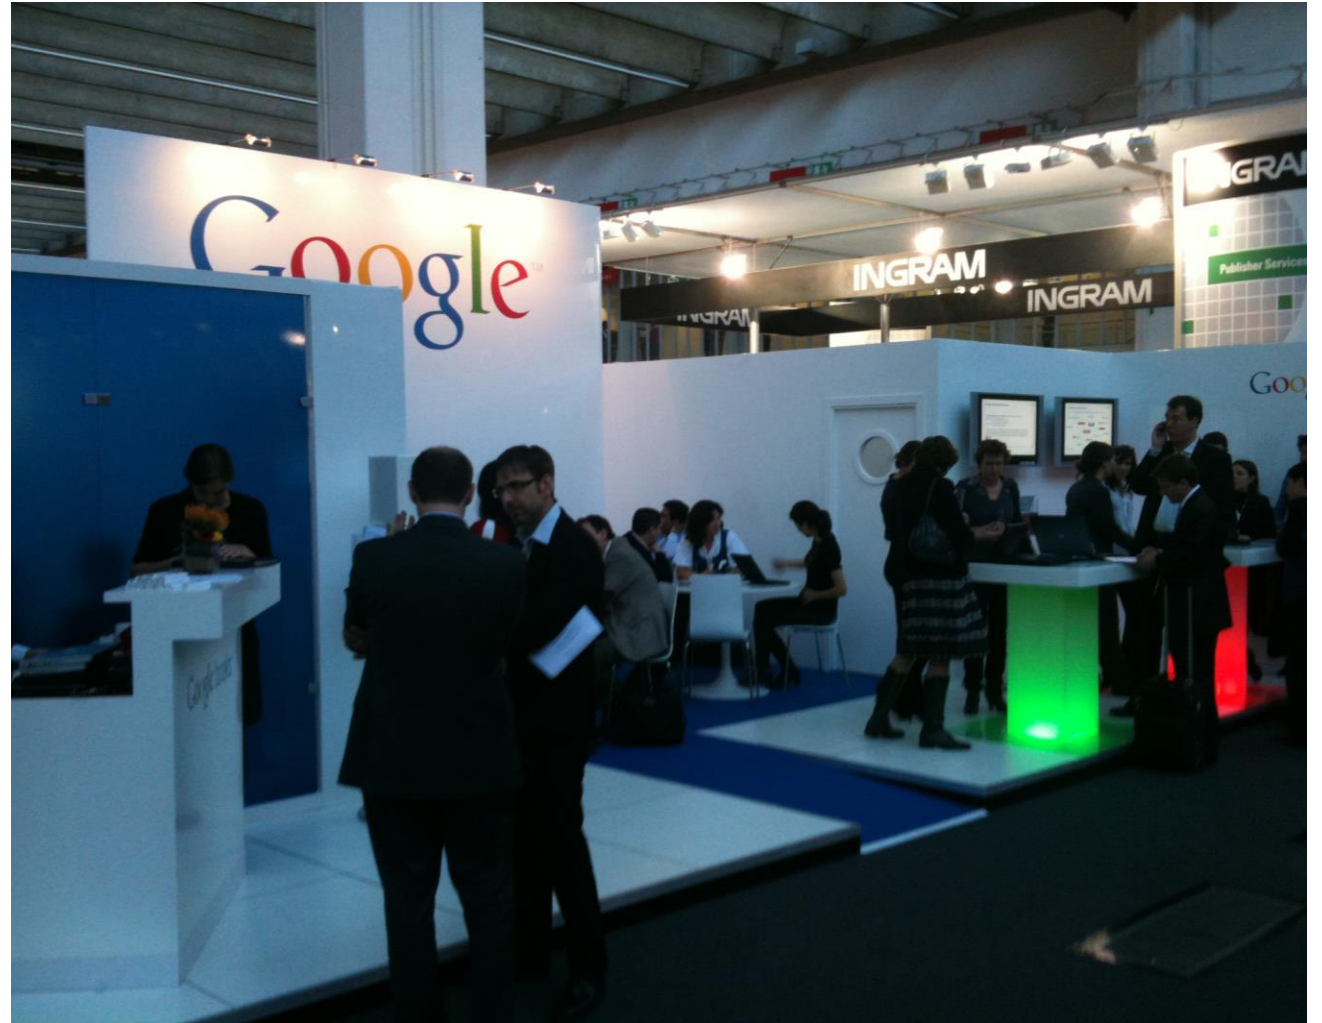

Frankfurt Book Fair, 2007  
Private photo

# Open Access books

Six European university presses  
(Amsterdam, Copenhagen, Firenze,  
Göttingen, Manchester and Lyon)

- ➔ EU co-funded OAPEN project 2008-2010
- ➔ Launch of the OAPEN Library in 2010

OAPEN turned into a non-profit Dutch  
foundation

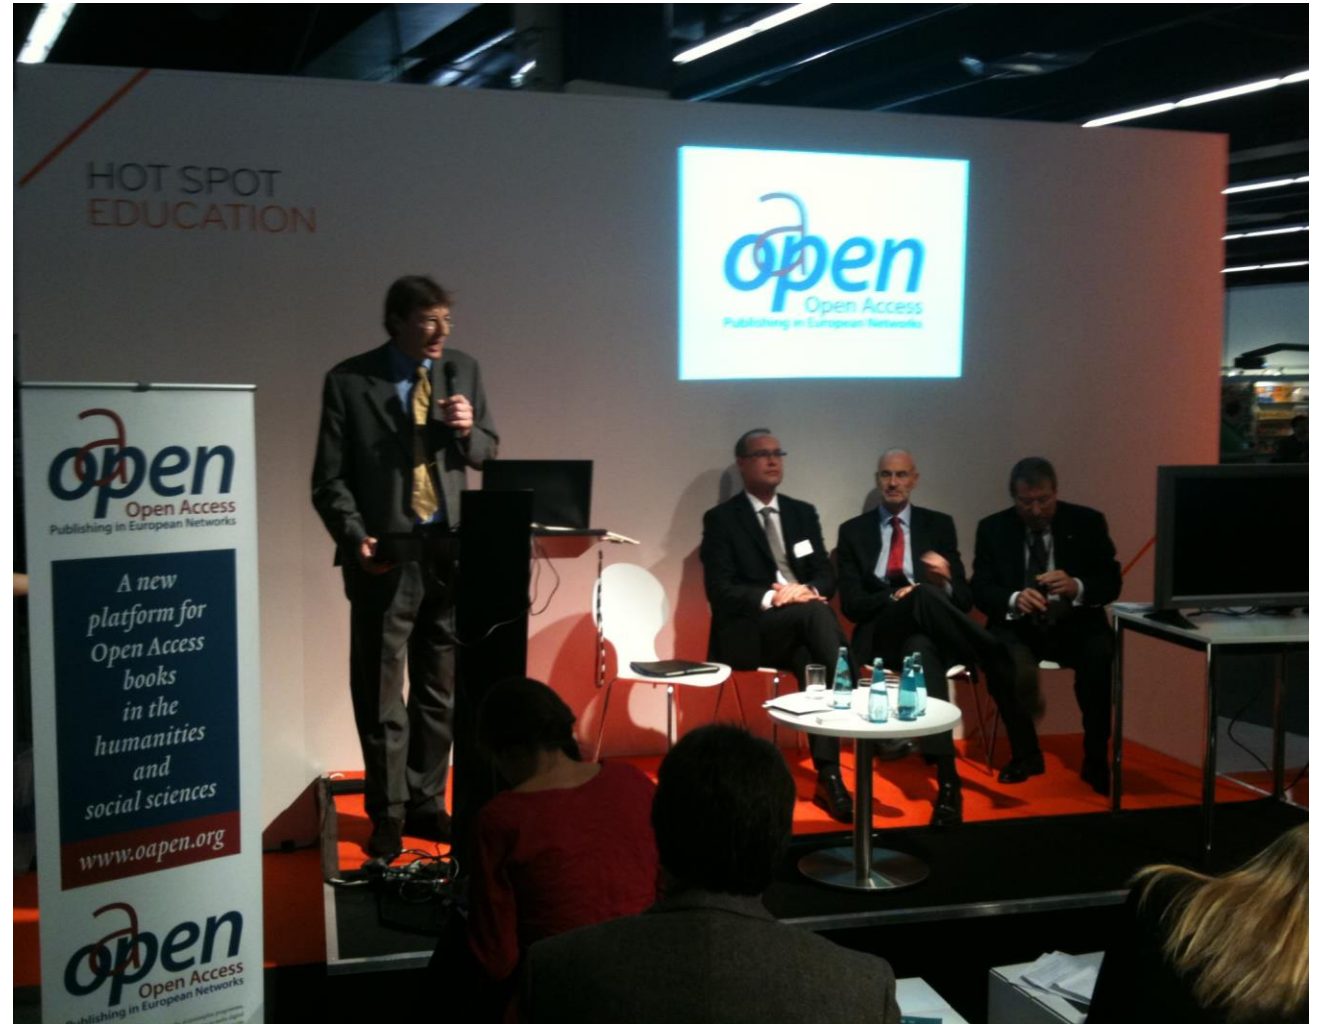

Frankfurt Book Fair, 2010  
Private photo

# Today

2022

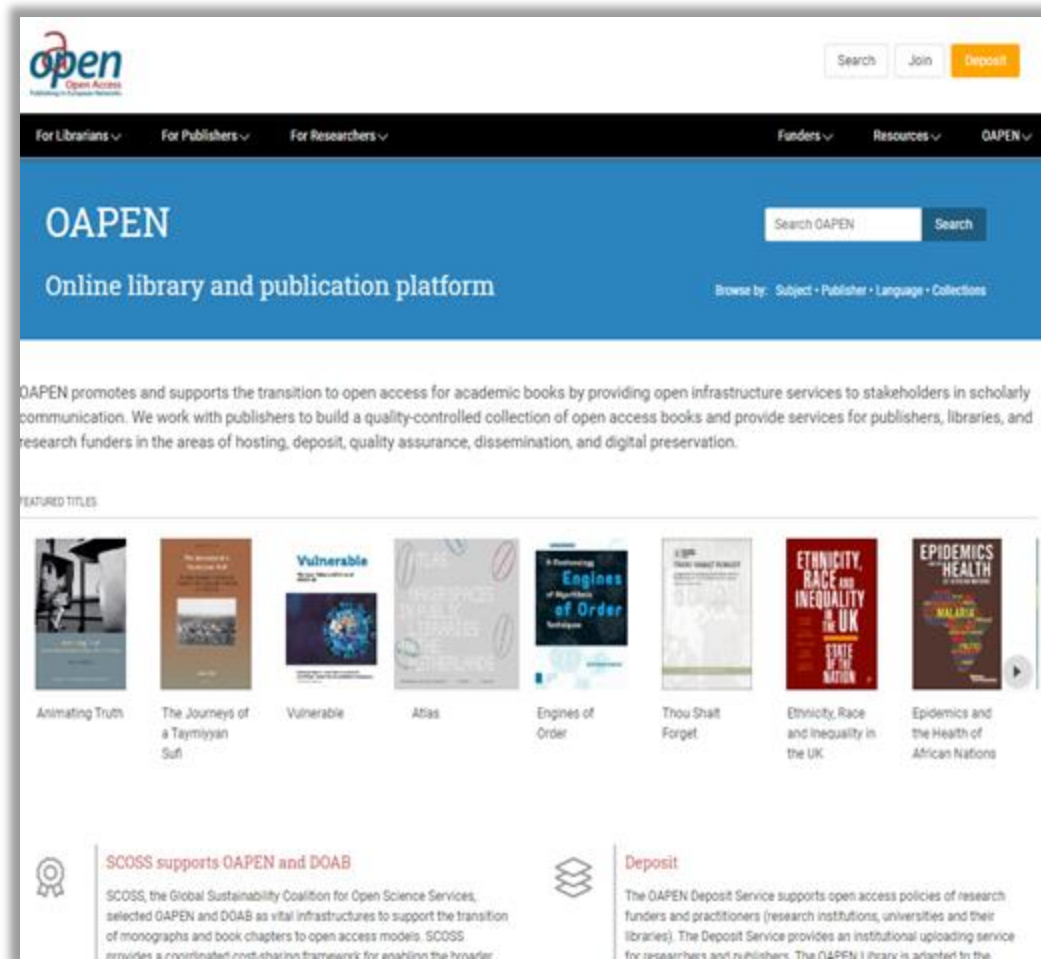

## Easy integration with library catalogues

- ✓ Metadata feeds in MARCXML, CSV, RIS, ONIX, KBART
- ✓ OAI-PMH Harvesting
- ✓ REST API
- ✓ RSS and Atom feeds

<https://oapen.org>

## OAPEN Library

Launched in 2010

400+ publishers

20,000+ peer reviewed open access books (full text)

Hosting, distribution, and preservation

DSpace 6.0

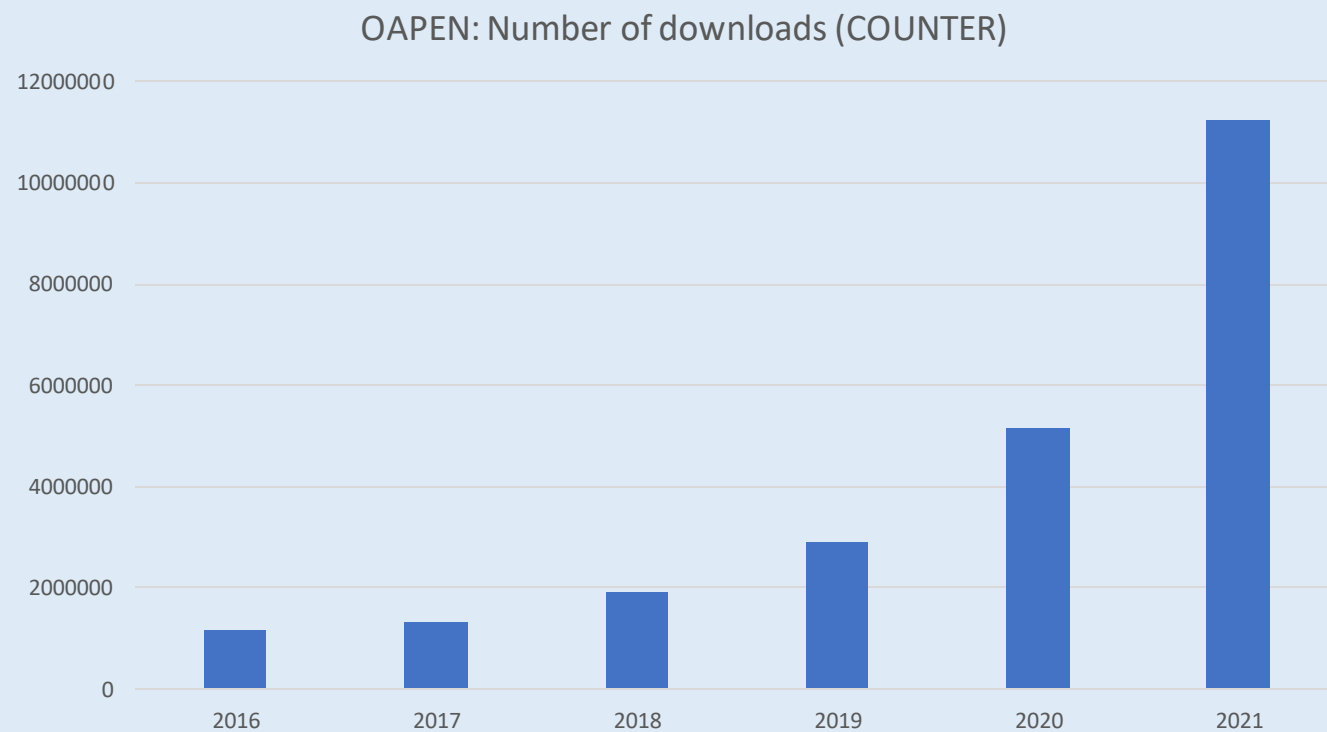



# Directory of Open Access Books (DOAB)

Launched in 2012

Global index of peer reviewed open access books

50,000+ OA books indexed

550+ OA book publishers

All metadata is freely available (CC0)

DSpace 6.0

Number of titles in DOAB

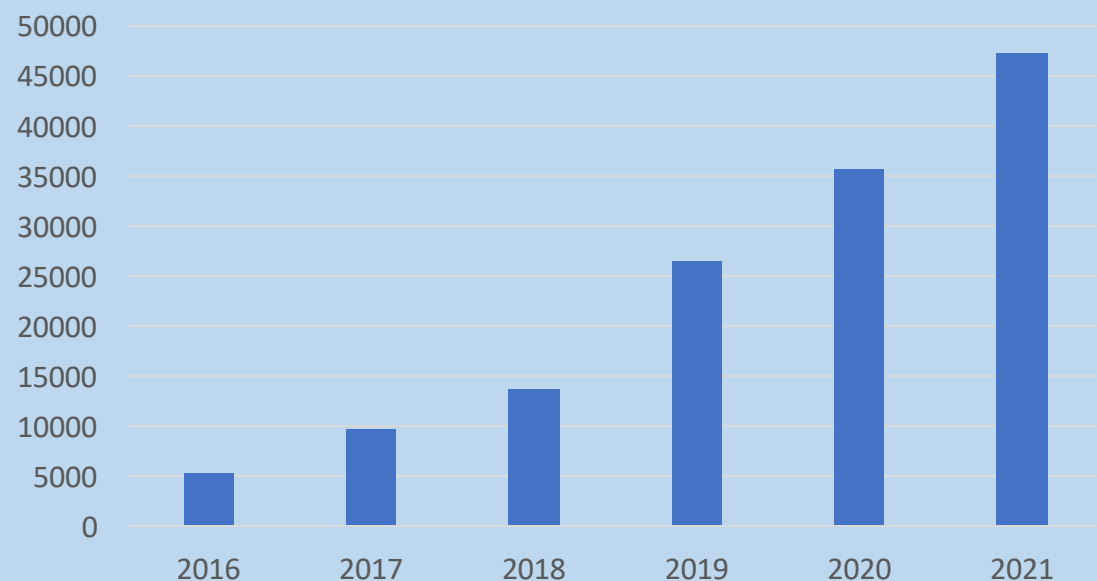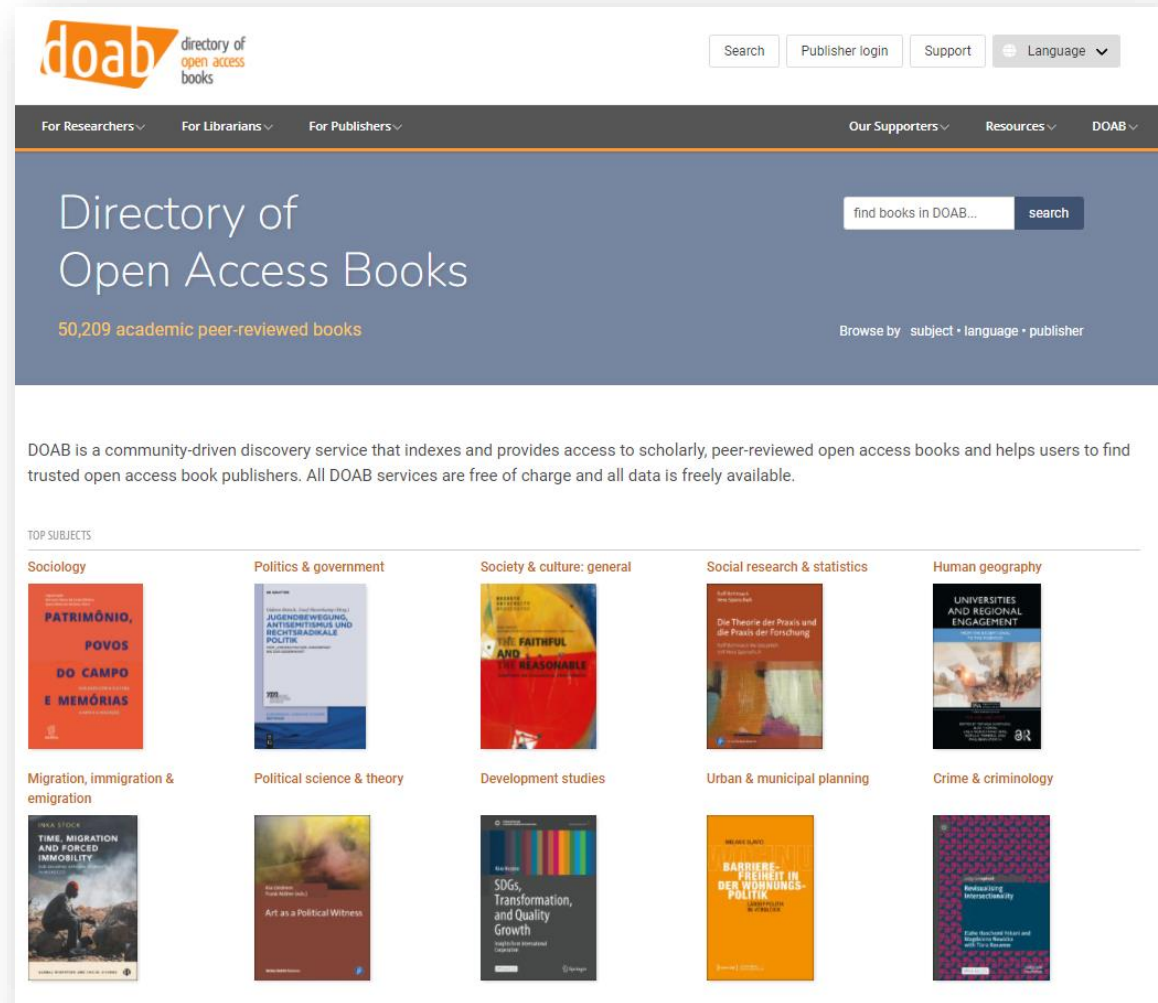

## Easy integration with library catalogues

- ✓ Metadata feeds in MARCXML, CSV, RIS, ONIX, KBART
- ✓ OAI-PMH Harvesting
- ✓ REST API
- ✓ RSS and Atom feeds

<https://doabooks.org>

## DOAB Trusted Platform Network

The Directory of Open Access Books (DOAB) serves as a central discovery service for open access books. DOAB collaborates with several trusted platforms to enhance the discoverability of open access books and create a more seamless process for publishers to list their open access books in DOAB.

Publishers who add their open access books to any of the platforms part of the DOAB Trusted Platform Network can request the platform to check and verify which of their open access books meet the DOAB criteria, and to automatically list verified books in DOAB thanks to this collaboration.

The following platforms are part of the DOAB Trusted Platform Network:

- [OAPEN Library](#)
- [OpenEdition](#)
- [Project MUSE](#)
- [SciELO Books](#)

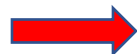

Users will be able to recognise DOAB trusted platforms thanks to a special “DOAB Trusted Platform” [icon](#). Through the DOAB Trusted Platform Network, DOAB and its partners aim to enhance discoverability, simplify metadata integration processes and increase trust in open access book platforms.

### About the DOAB Trusted Platforms

[About OAPEN Library](#)

[About OpenEdition](#)

[About Project MUSE](#)

[About SciELO Books](#)

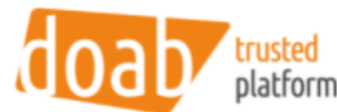

#### FOR PUBLISHERS

[Join DOAB: requirements, application](#)

[PRISM: Peer Review Information Service for Monographs](#)

[Upload procedure, instructions](#)

[DOAB Trusted Platform Network](#)

[Sponsor DOAB](#)

[FAQ](#)

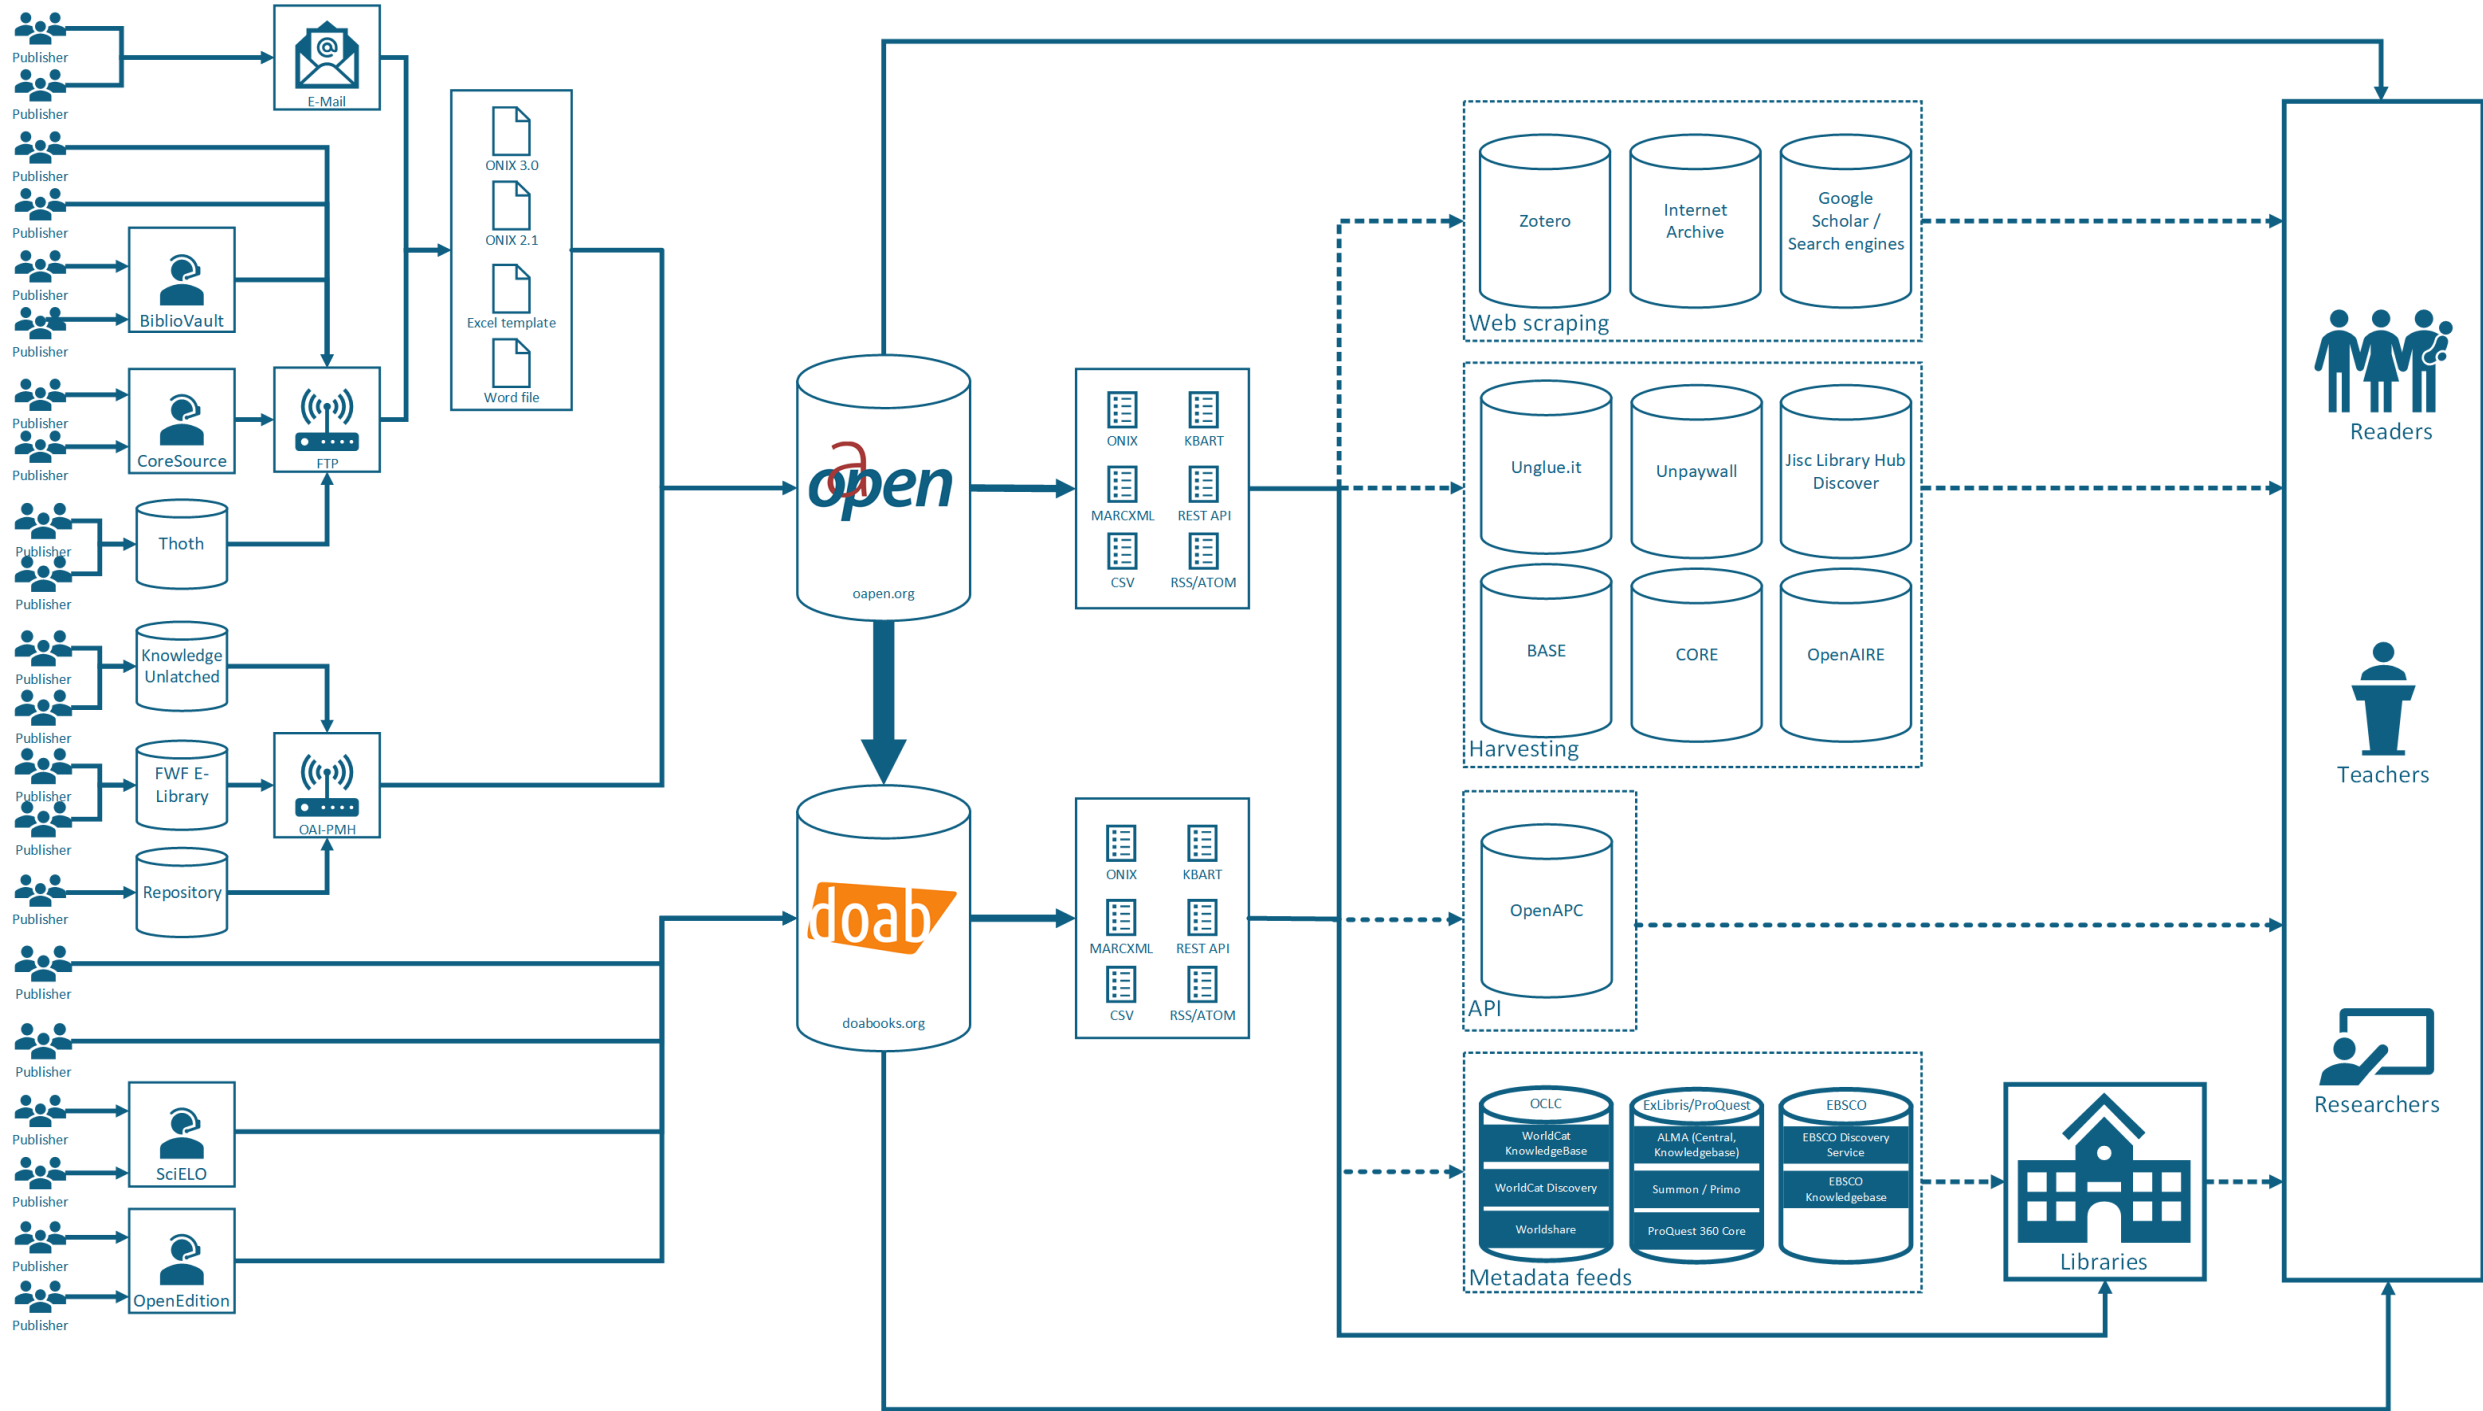

# OAPEN OA Books Toolkit, launched autumn 2020

<https://oabooks-toolkit.org>

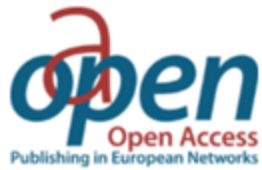

Life cycle

FAQ

Keywords

Glossary

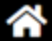

About OA ▾

The OA Books landscape ▾

About the Toolkit ▾

Support ▾

Resources ▾

## OAPEN OA Books Toolkit

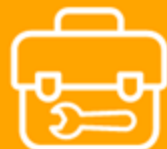

### For authors

This toolkit aims to help book authors to better understand open access book publishing and to increase trust in open access books. You will be able to find relevant articles on open access book publishing following the research lifecycle, by browsing frequently asked questions or by searching with keywords.

Life cycle ▶

FAQ ▶

Keywords ▶



# Open Access Books Network

Public 328  
Group Members

Activity Discussion Site From CORE 11 Docs Files 39 Members 328

## Community initiatives

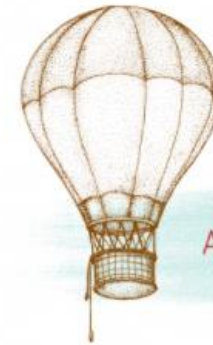

20  
21  
OABN

A year of spreading wings

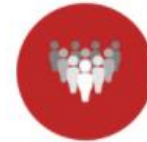

986 Twitter followers  
38 YouTube subscribers  
307 HC members  
110 Slack channel members  
209 mailing list subscribers

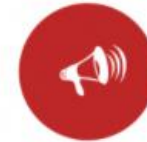

10 blog posts  
17 YouTube videos  
2 print interviews  
1,139 YouTube views

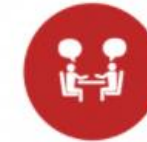

4 OA Books Workouts sessions  
5 Voices workshops  
4 OA Mythbusters videos  
4 OA Bookmarks sessions  
2 conference presentations

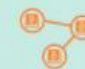

### COMMUNITY CONTRIBUTORS

OPERAS  
OASPA  
OATP  
CAMBRIDGE UNIVERSITY LIBRARY  
KU LEUVEN LIBRARY

MEDIASTUDIES.PRESS  
COPIM  
UCT LIBRARY  
DARIAH-EU  
THE CONTINENTAL PLATFORM

The end of my  
presentation  
- not of the saga!

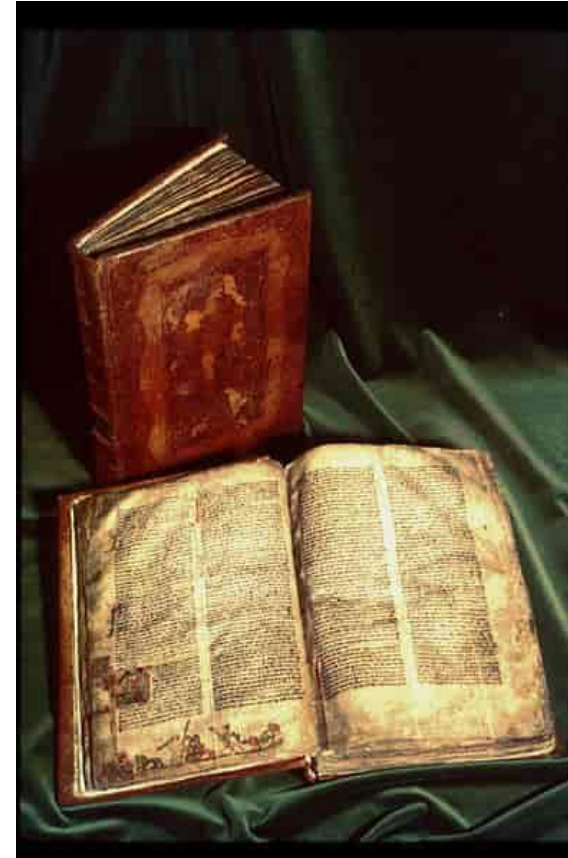

Saga, Store Norske Leksikon  
(Public Domain CC0)

# Happy Anniversary!

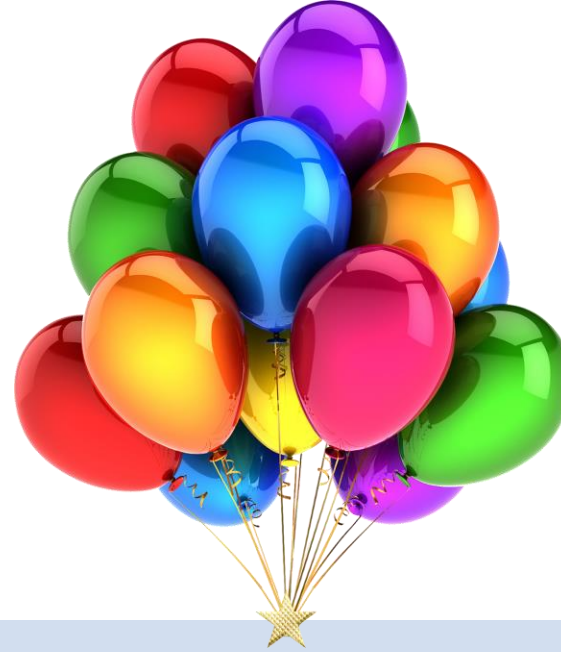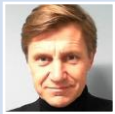

Niels Stern, director, [stern@oapen.org](mailto:stern@oapen.org)

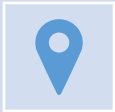

<https://doabooks.org> | <https://oapen.org>

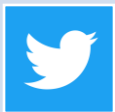

@nielsstern | @DOABooks | @OAPENbooks
